# Supplementary material for: Prognostic value of blood-based fibrosis biomarkers in patients with metastatic colorectal cancer receiving chemotherapy and bevacizumab
Source: PubMed Central journal article supplement (PMC7806753; doi:10.1038/s41598-020-79608-0), 2021-01-13
Supplement: 41598_2020_79608_MOESM1_ESM.pdf [file 41598_2020_79608_MOESM1_ESM.pdf]

## Supplementary figures

### **Prognostic value of blood-based fibrosis biomarkers in patients with metastatic colorectal cancer receiving chemotherapy and bevacizumab**

Neel I. Nissen<sup>1,2#\*</sup>, Stephanie Kehlet<sup>2#</sup>, Mogens K. Boisen<sup>3</sup>, Maria Liljefors<sup>4</sup>, Christina Jensen<sup>2</sup>, Astrid Z. Johansen<sup>3</sup>, Julia S. Johansen<sup>3,5,6</sup>, Janine T. Erler<sup>1</sup>, Morten Karsdal<sup>2</sup>, Joachim H. Mortensen<sup>2</sup>, Anette Høye<sup>1</sup>, and Nicholas Willumsen<sup>2</sup>

#authors contributed equally to the work

\**Corresponding author*: Neel Ingemann Nissen, Herlev Hovedgade 205-207 2730 Herlev, Denmark. +45 4452 5252, [nin@nordicbio.com](mailto:nin@nordicbio.com)

<sup>1</sup>Biotech Research & Innovation Centre (BRIC), University of Copenhagen (UCPH), Denmark.

<sup>2</sup>Biomarkers & Research, Nordic Bioscience, Herlev, Denmark.

<sup>3</sup>Department of Oncology, Herlev and Gentofte Hospital, Copenhagen University Hospital, Denmark.

<sup>4</sup>Department of Clinical Science, Intervention and Technology, Karolinska University Hospital Huddinge, Stockholm, Sweden

<sup>5</sup>Department of Medicine, Herlev and Gentofte Hospital, Copenhagen University Hospital, Denmark.

<sup>6</sup>Department of Clinical Medicine, Faculty of Health and Medical Sciences, University of Copenhagen, Denmark

**Figure S1:** Assessment of the prognostic potential of low and high (median) biomarker levels in patients in first line chemotherapy a) PRO-C3 (formation of collagen type III), b) PRO-C6 (formation of collagen type VI), c) C6M (degradation of collagen type VI $\alpha$ 1) and d) C6M $\alpha$ 3 (degradation of collagen type VI $\alpha$ 3) serum levels by Kaplan Meier plots. Cox proportional-hazards regression was used to calculate the hazard ratios (HR) with 95% CI and p-values. A  $p < 0.05$  was considered significant.

**Figure S2:** Assessment of the prognostic potential of low and high (median) biomarker levels in patients in second or later line of chemotherapy a) PRO-C3 (formation of collagen type III), b) PRO-C6 (formation of collagen type VI), c) C6M (degradation of collagen type VI $\alpha$ 1) and d) C6M $\alpha$ 3 (degradation of collagen type VI $\alpha$ 3) serum levels by Kaplan Meier plots. Cox proportional-hazards regression was used to calculate the hazard ratios (HR) with 95% CI and p-values. A  $p < 0.05$  was considered significant.

**Fig S1:**

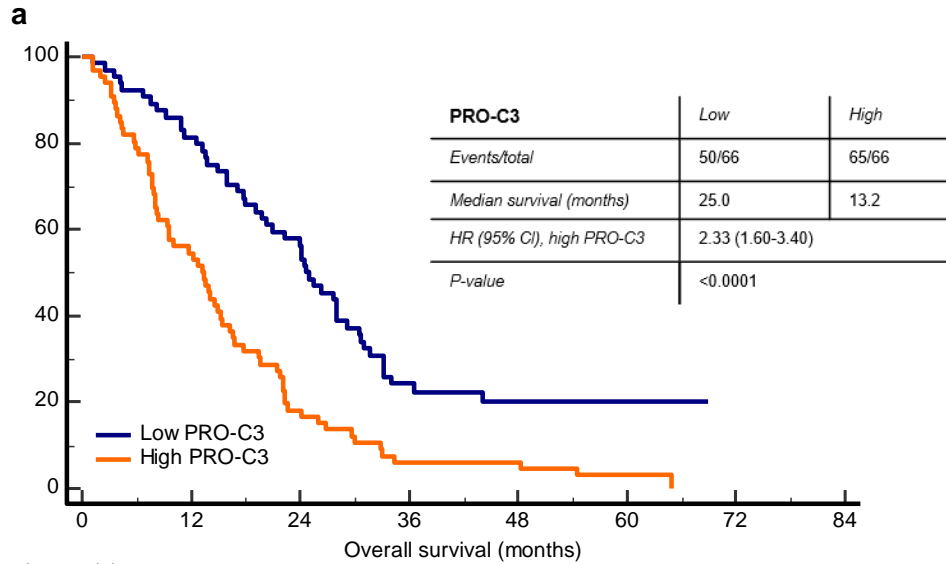

Number at risk

| Group: Low PRO-C3 | 0  | 12 | 24 | 36 | 48 | 60 | 72 |
|-------------------|----|----|----|----|----|----|----|
| 66                | 52 | 36 | 13 | 8  | 1  | 0  |    |

| Group: High PRO-C3 | 0  | 12 | 24 | 36 | 48 | 60 | 72 |
|--------------------|----|----|----|----|----|----|----|
| 66                 | 36 | 12 | 4  | 4  | 1  | 0  |    |

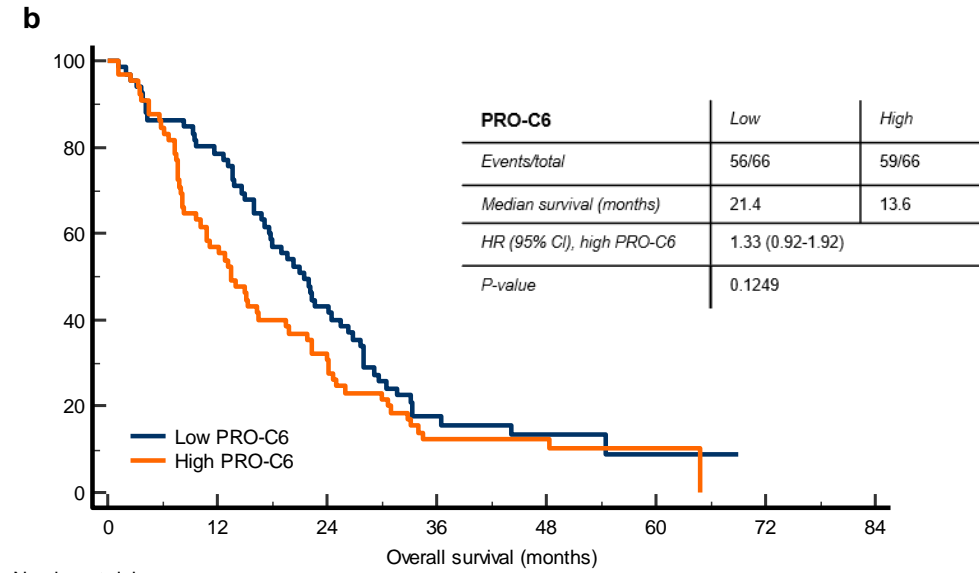

Number at risk

| Group: Low PRO-C6 | 0  | 12 | 24 | 36 | 48 | 60 | 72 |
|-------------------|----|----|----|----|----|----|----|
| 66                | 51 | 28 | 9  | 6  | 1  | 0  |    |

| Group: High PRO-C6 | 0  | 12 | 24 | 36 | 48 | 60 | 72 |
|--------------------|----|----|----|----|----|----|----|
| 66                 | 37 | 20 | 8  | 6  | 1  | 0  |    |

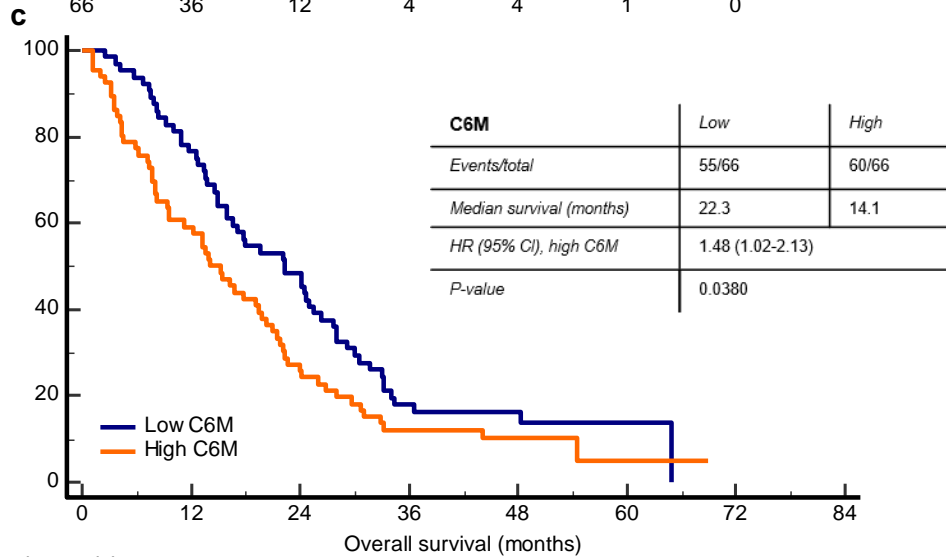

Number at risk

| Group: Low C6M | 0  | 12 | 24 | 36 | 48 | 60 | 72 |
|----------------|----|----|----|----|----|----|----|
| 66             | 49 | 31 | 10 | 8  | 1  | 0  |    |

| Group: High C6M | 0  | 12 | 24 | 36 | 48 | 60 | 72 |
|-----------------|----|----|----|----|----|----|----|
| 66              | 39 | 17 | 7  | 4  | 1  | 0  |    |

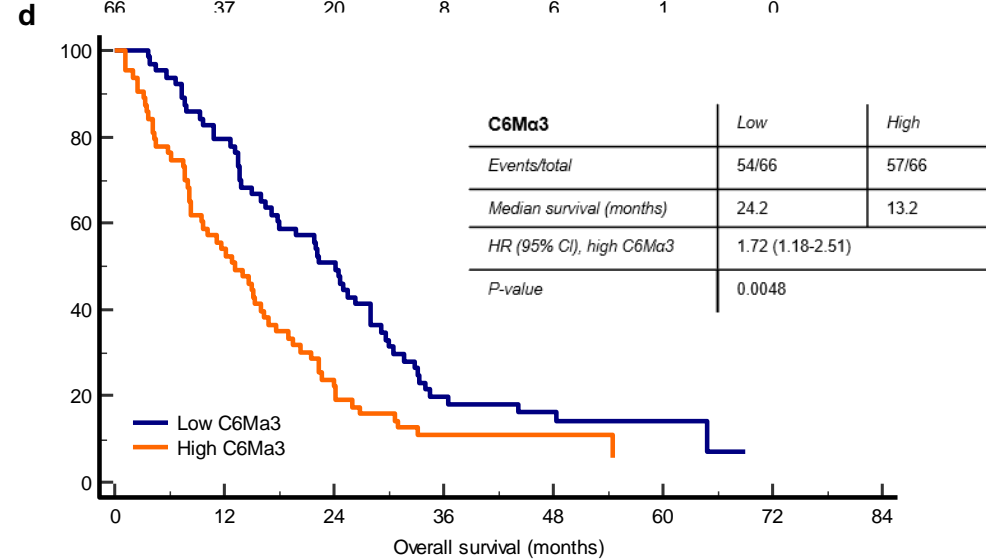

Number at risk

| Group: Low C6Ma3 | 0  | 12 | 24 | 36 | 48 | 60 | 72 |
|------------------|----|----|----|----|----|----|----|
| 66               | 50 | 32 | 12 | 8  | 2  | 0  |    |

| Group: High C6Ma3 | 0  | 12 | 24 | 36 | 48 | 60 | 72 |
|-------------------|----|----|----|----|----|----|----|
| 66                | 34 | 14 | 5  | 4  | 0  | 0  |    |

**Fig S2:**

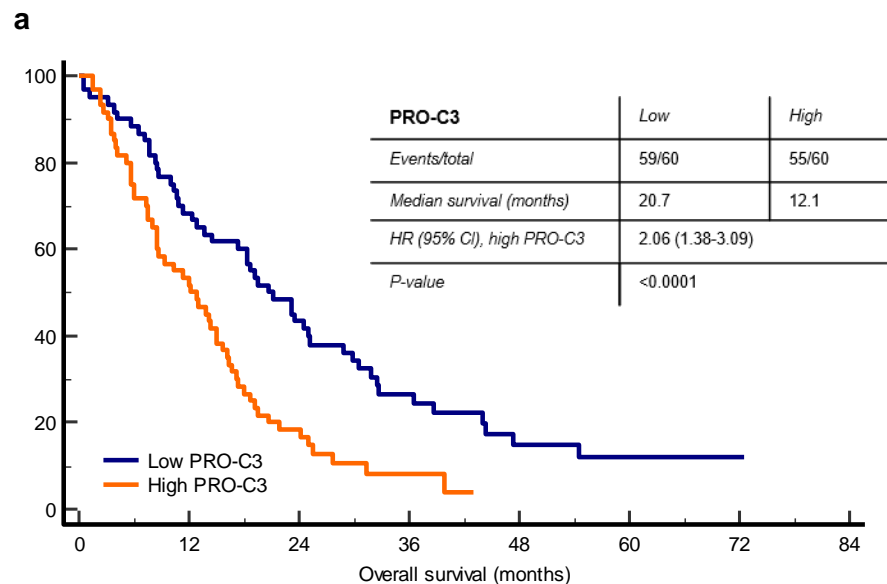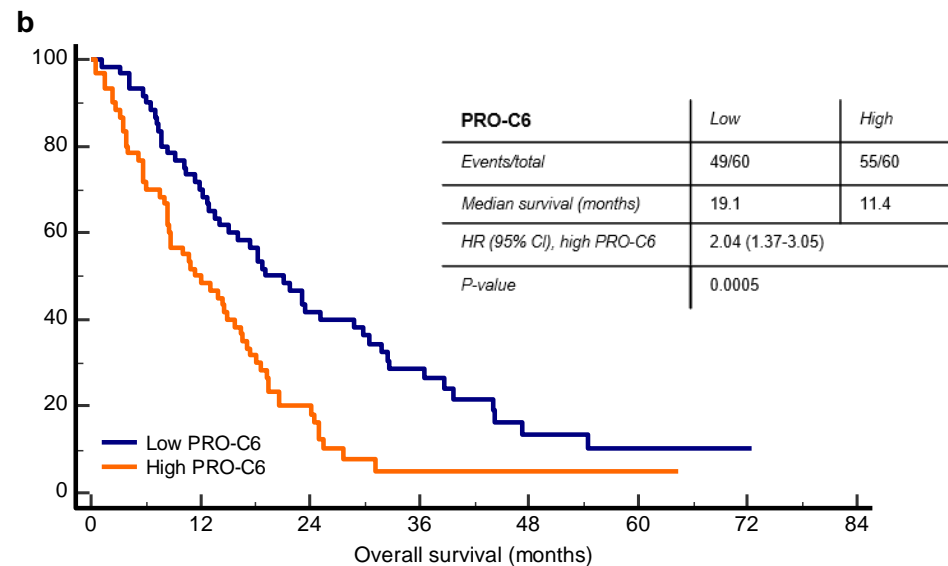

Number at risk

| Overall survival (months) | 0  | 12 | 24 | 36 | 48 | 60 | 72 | 84 |
|---------------------------|----|----|----|----|----|----|----|----|
| Group: Low PRO-C3         | 60 | 41 | 26 | 12 | 5  | 4  | 1  | 0  |
| Group: High PRO-C3        | 60 | 31 | 10 | 3  | 0  | 0  | 0  | 0  |

Number at risk

| Overall survival (months) | 0  | 12 | 24 | 36 | 48 | 60 | 72 | 84 |
|---------------------------|----|----|----|----|----|----|----|----|
| Group: Low PRO-C6         | 60 | 42 | 25 | 13 | 4  | 3  | 1  | 0  |
| Group: High PRO-C6        | 60 | 30 | 11 | 2  | 1  | 1  | 0  | 0  |

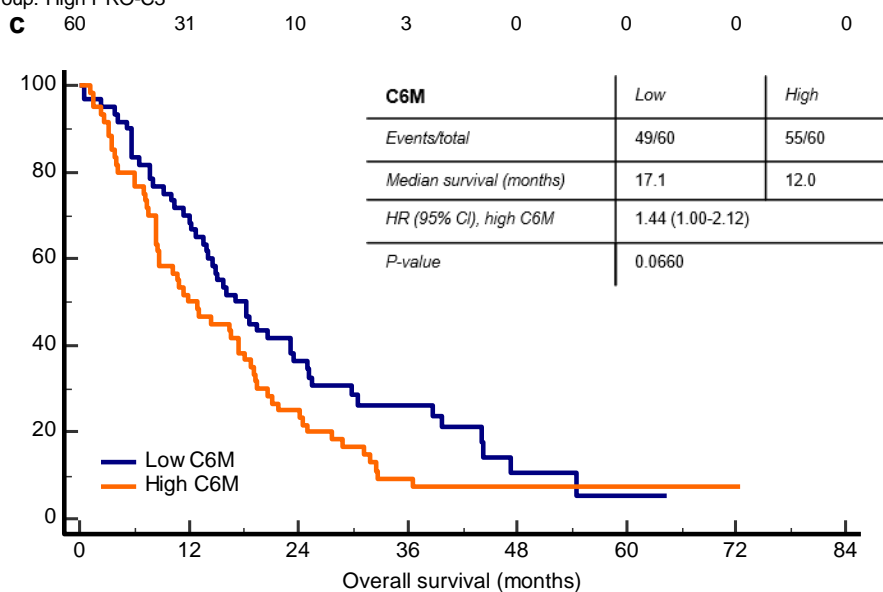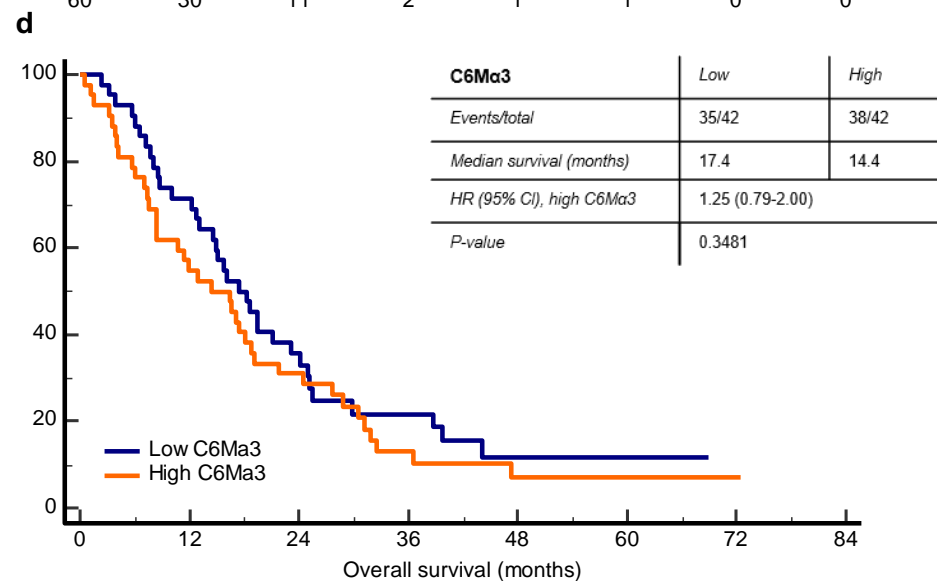

Number at risk

| Overall survival (months) | 0  | 12 | 24 | 36 | 48 | 60 | 72 | 84 |
|---------------------------|----|----|----|----|----|----|----|----|
| Group: Low C6M            | 60 | 42 | 21 | 10 | 2  | 1  | 0  | 0  |
| Group: High C6M           | 60 | 30 | 15 | 5  | 3  | 3  | 1  | 0  |

Number at risk

| Overall survival (months) | 0  | 12 | 24 | 36 | 48 | 60 | 72 | 84 |
|---------------------------|----|----|----|----|----|----|----|----|
| Group: Low C6Ma3          | 42 | 30 | 14 | 7  | 2  | 2  | 0  | 0  |
| Group: High C6Ma3         | 42 | 23 | 13 | 5  | 2  | 2  | 1  | 0  |
